# Supplementary material for: Using Weakly Conserved Motifs Hidden in Secretion Signals to Identify Type-III Effectors from Bacterial Pathogen Genomes
Source: PubMed Central journal article supplement (PMC3577856; doi:10.1371/journal.pone.0056632), 2013-02-20

**S...Q, Rank = 1**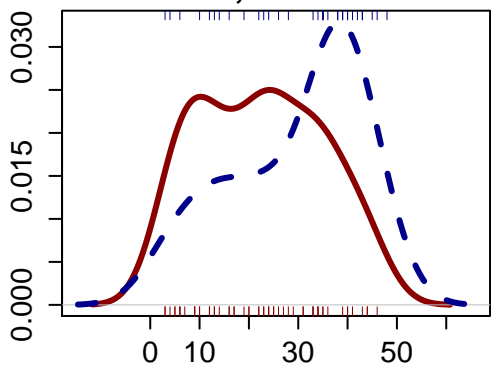**S..S, Rank = 2**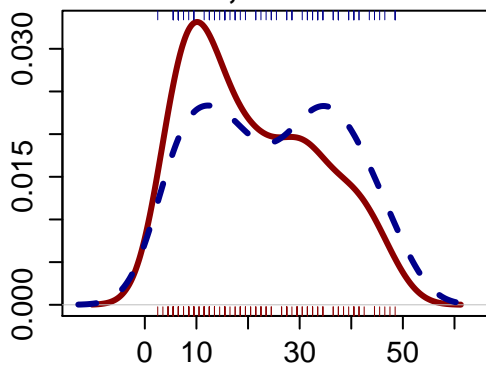**SL, Rank = 3**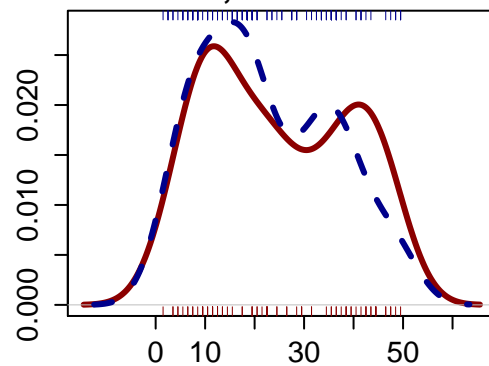**P...P, Rank = 4**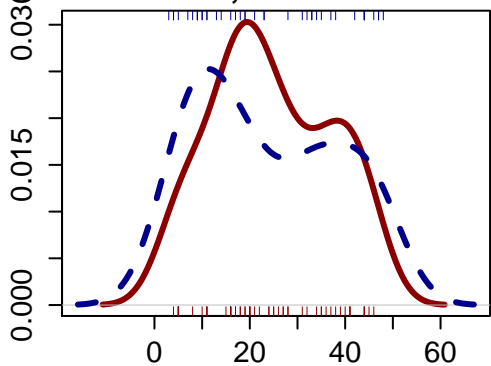**LS, Rank = 5**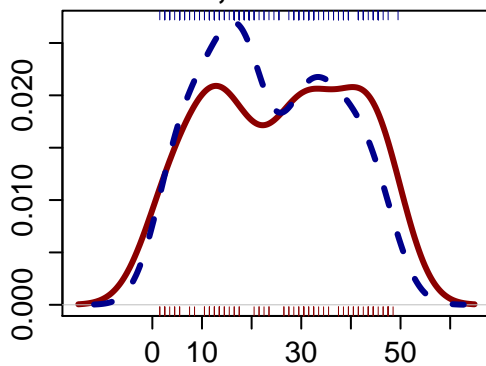**G.Q, Rank = 6**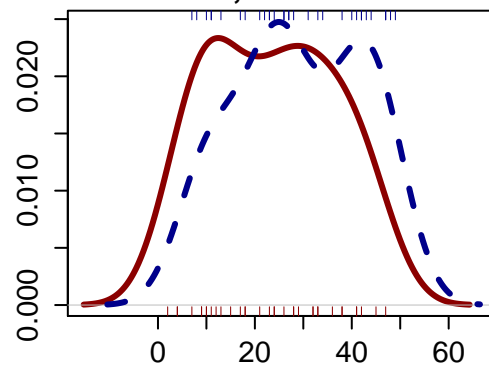**S.S, Rank = 7**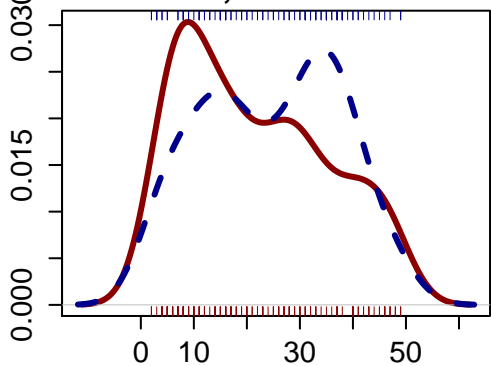**S..N, Rank = 8**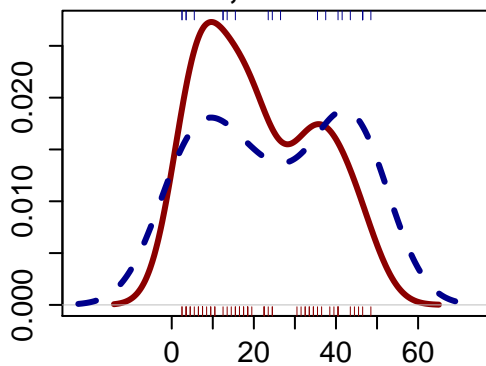**SS, Rank = 9**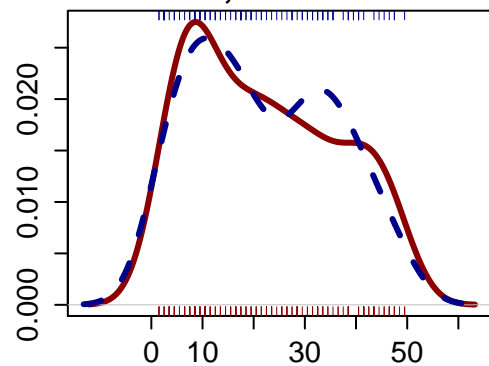**PS, Rank = 10**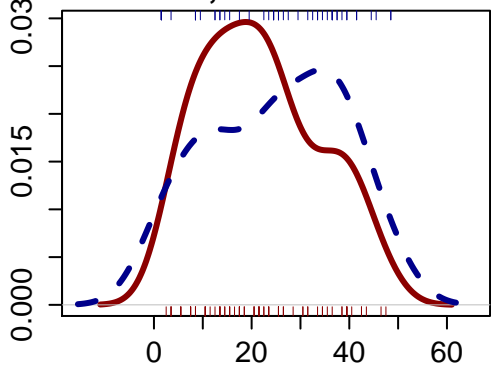**S...S, Rank = 11**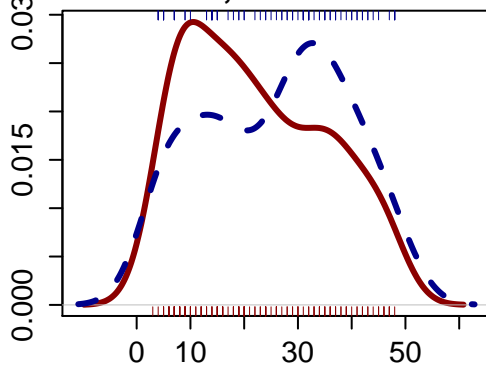**Q.P, Rank = 12**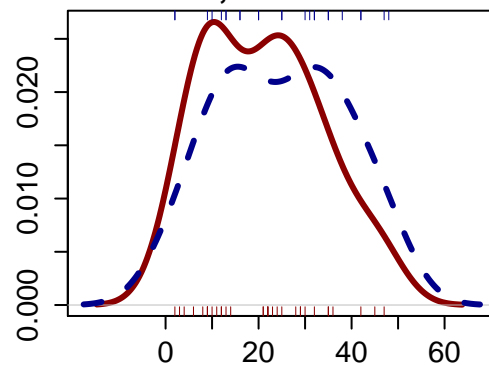

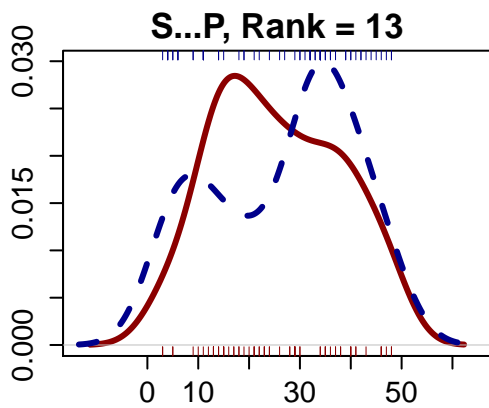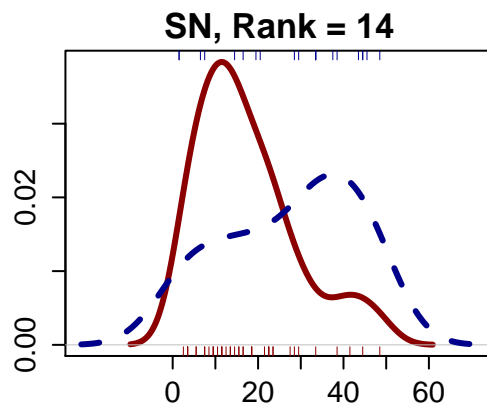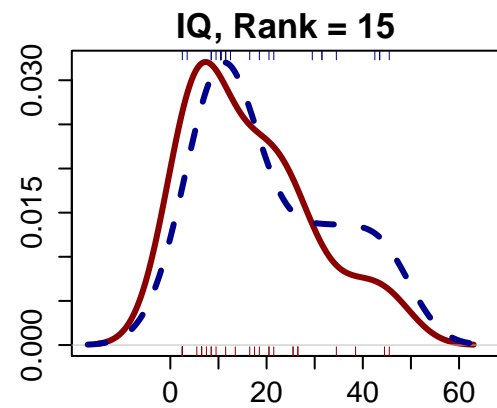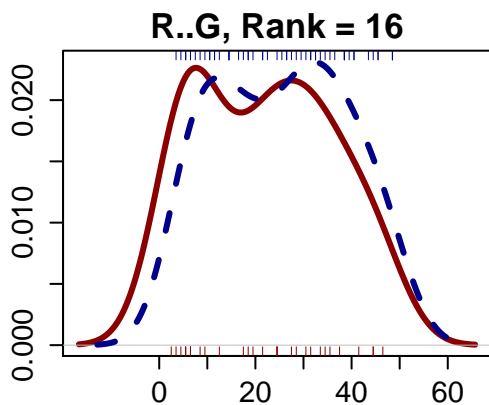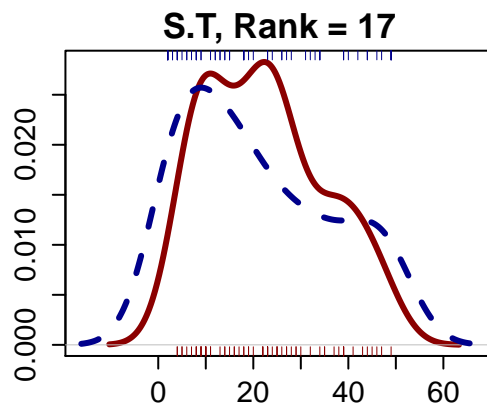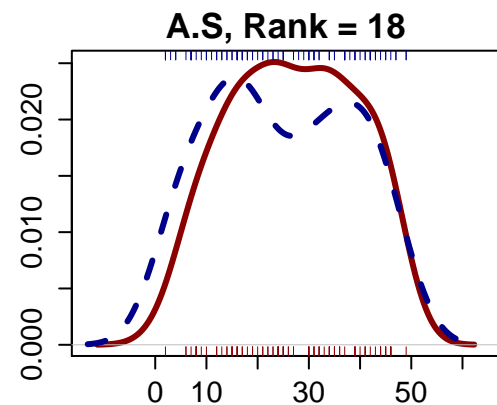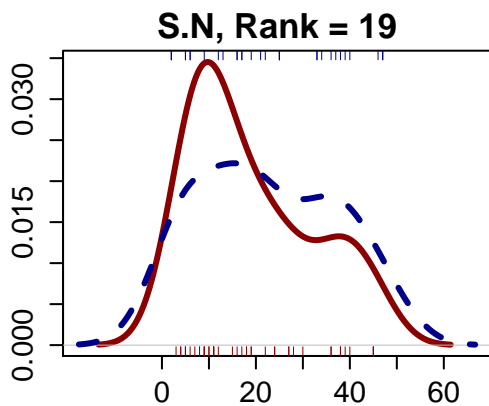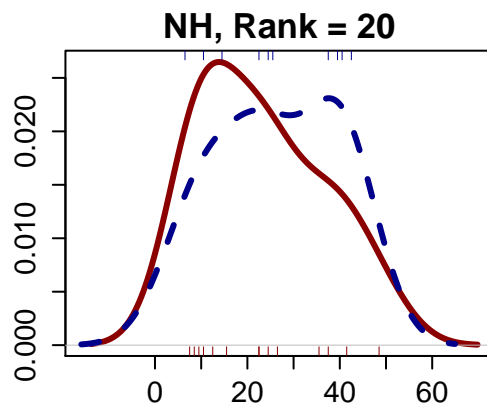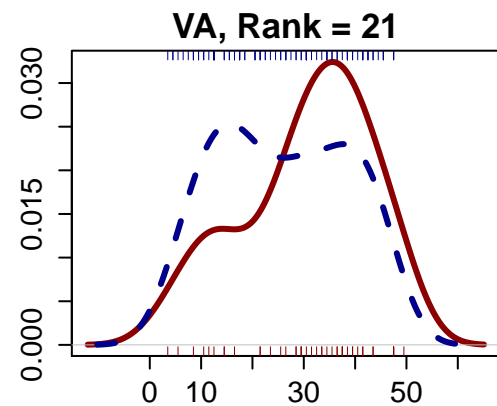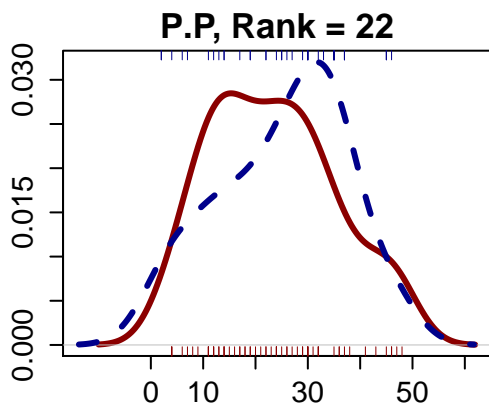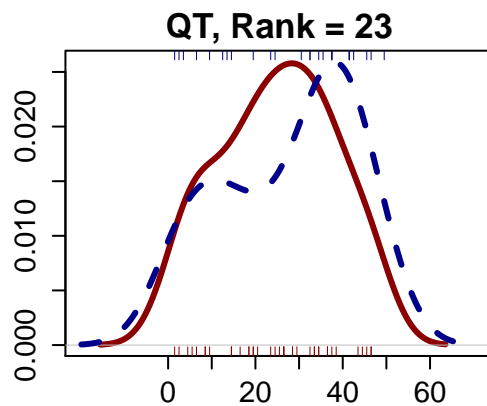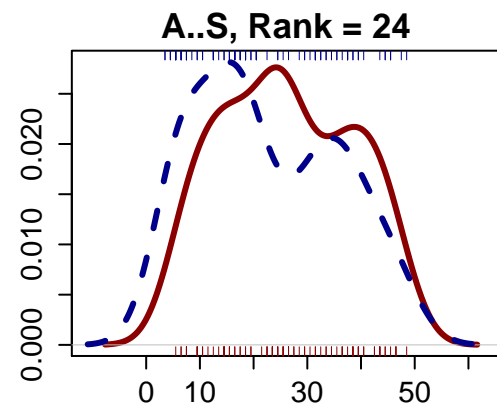

**T.V, Rank = 25**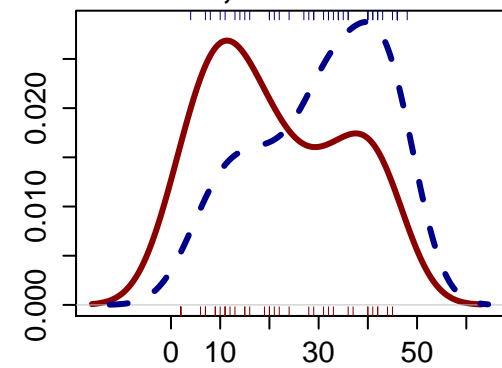**G..S, Rank = 26**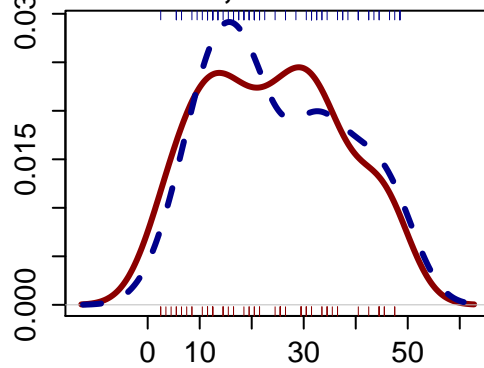**S...T, Rank = 27**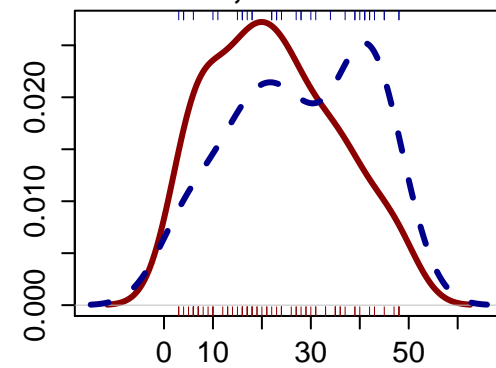**I.R, Rank = 28**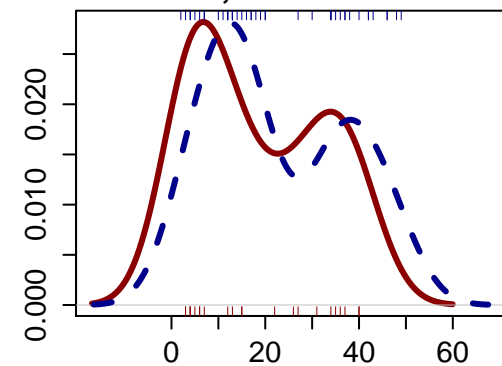**R.E, Rank = 29**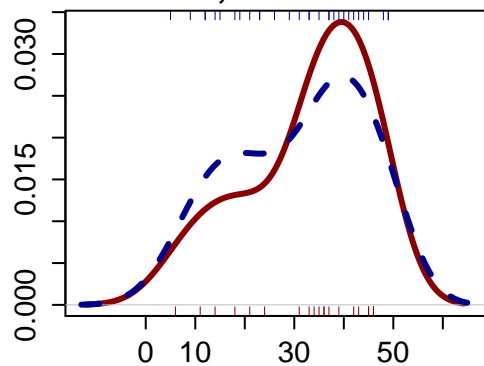**V...S, Rank = 30**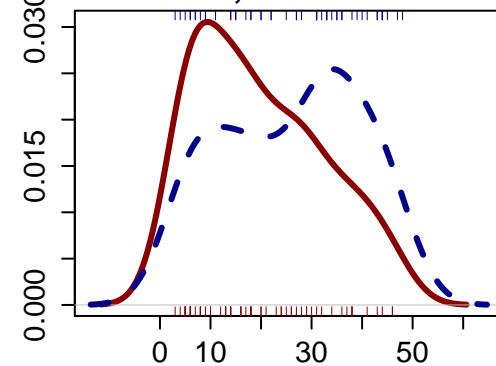**A.K, Rank = 31**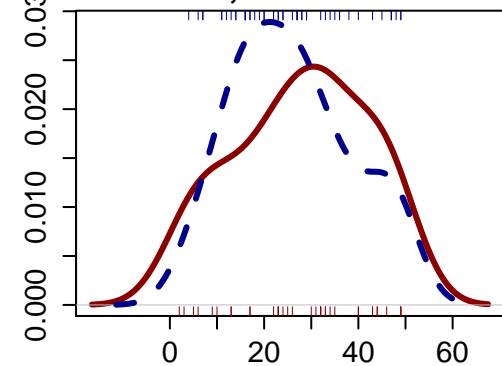**P...S, Rank = 32**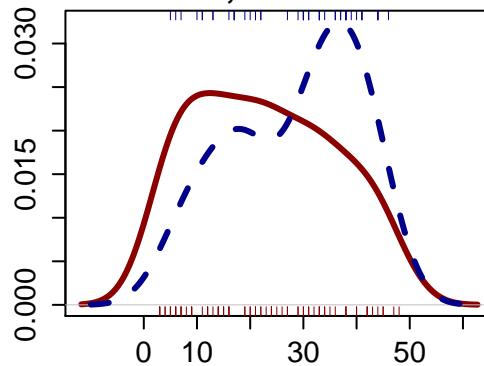**Q..F, Rank = 33**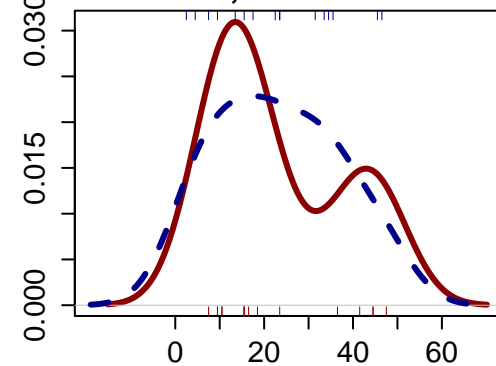**P..S, Rank = 34**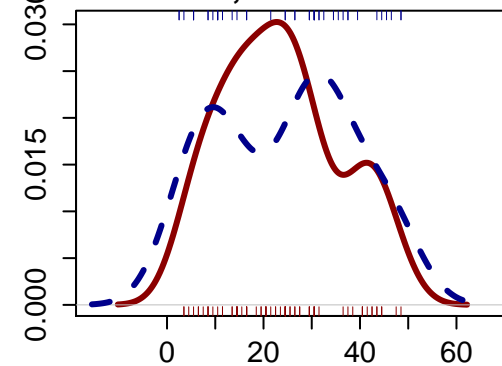**Q..P, Rank = 35**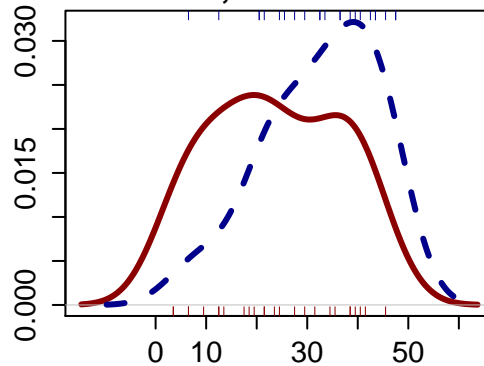**I..S, Rank = 36**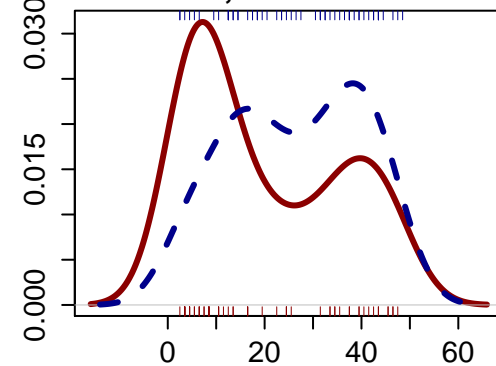

**N.Q, Rank = 37**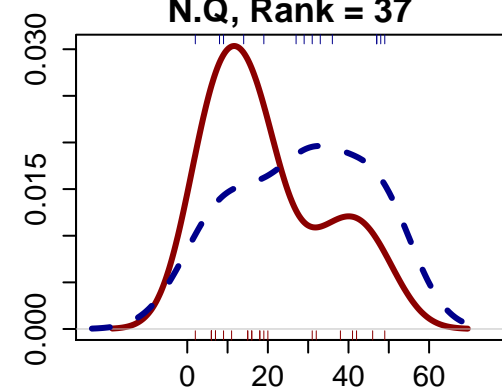**N...S, Rank = 38**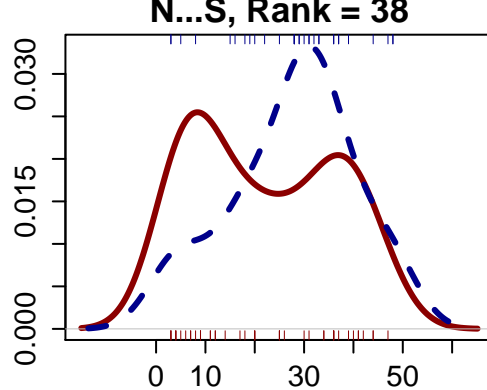**G...P, Rank = 39**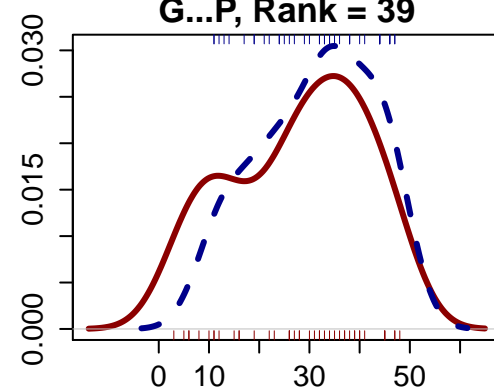**S..T, Rank = 40**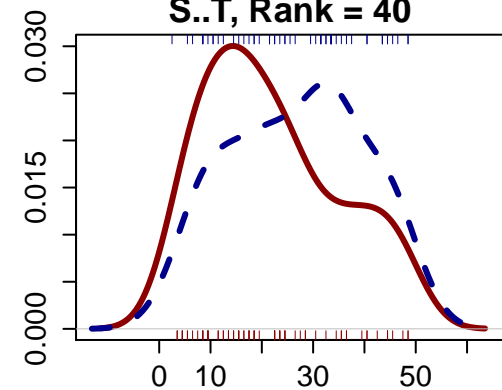**QG, Rank = 41**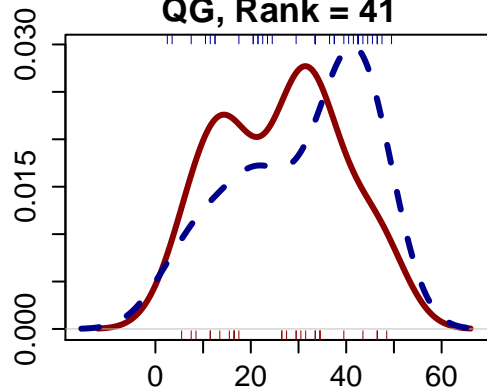**A...S, Rank = 42**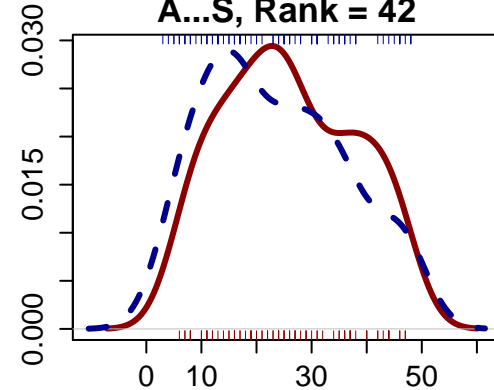**GP, Rank = 43**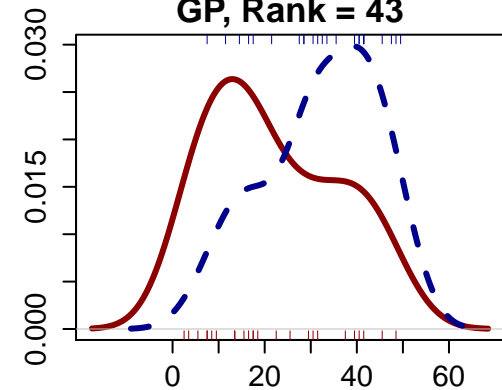**P.G, Rank = 44**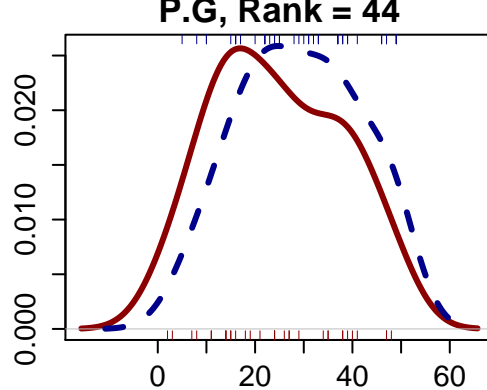**S..Q, Rank = 45**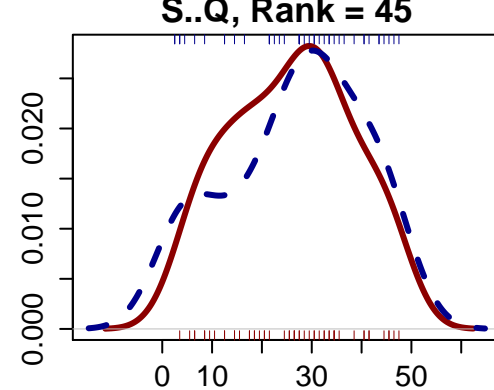**I..K, Rank = 46**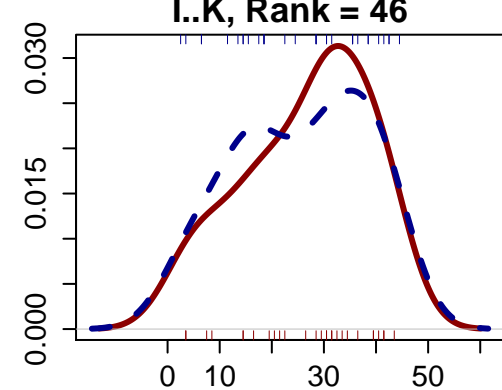**S...G, Rank = 47**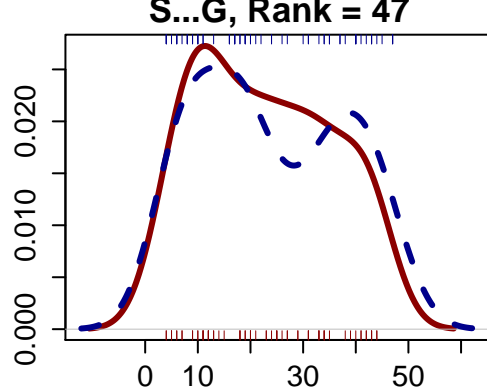**S.A, Rank = 48**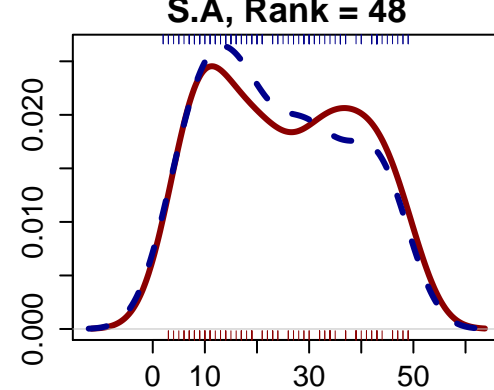

**AS, Rank = 49**

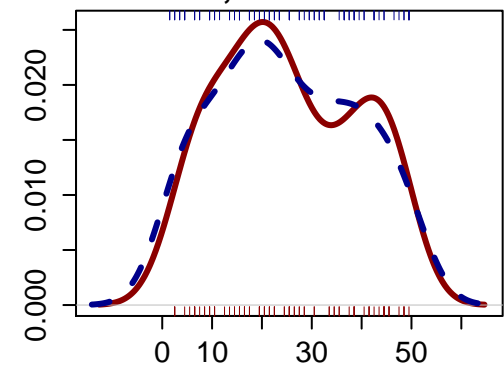

**N.F, Rank = 50**

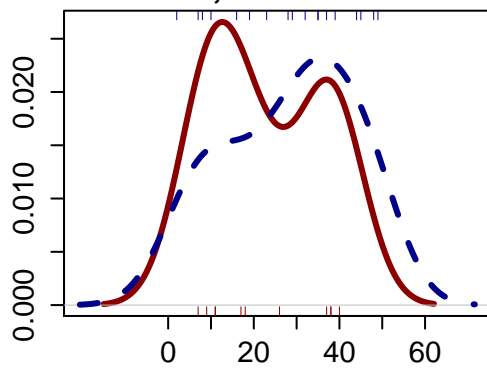

Supplement: pone.0056632.s002.pdf [file pone.0056632.s002.pdf]
